# Supplementary material for: Performance of wastewater biological phosphorus removal under long-term exposure to CuNPs: adapting toxicity via microbial community structure adjustment
Source: Royal Society of Chemistry journal article supplement (doi:10.1039/c5ra11579e), 2015-01-01
Supplement: c5ra11579e1.pdf [file c5ra11579e1.pdf]

1 **Supporting Information**

2 **Performance of Wastewater Biological Phosphorus Removal under Long-term**

3 **Exposure to CuNPs: Adapting Toxicity via Microbial Community Structure**

4 **Adjustment**

5 Hong Chen<sup>1</sup>, Xiang Li<sup>1</sup>, Yinguang Chen<sup>2\*</sup>, Yanan Liu<sup>1</sup>, He Zhang<sup>1</sup>, Gang Xue<sup>1</sup>

6 (<sup>1</sup> *School of Environmental Science and Engineering, Donghua University, 2999 North Renmin Road,*  
7 *Songjiang District, Shanghai, 201620, China;*

8 <sup>2</sup> *State Key Laboratory of Pollution Control and Resource Reuse, School of Environmental Science and*  
9 *Engineering, Tongji University, 1239 Siping Road, Shanghai 200092, China)*

10 \*Corresponding author

11 E-mail: yg2chen@yahoo.com

12 Tel: 86-21-65981263

13 Fax: 86-21-65986313

## 14 Analytical Methods

15 **Synthetic Wastewater.** The synthetic wastewater included stock SOP solution named “P-water”,  
16 “concentration solution”, “trace-element solution” (adapted from Smolders et al.<sup>1</sup>), a certain amount of carbon  
17 source and tap water. The P-water contained (g/L): 23.5  $\text{KH}_2\text{PO}_4$  and 17.6  $\text{K}_2\text{HPO}_4 \cdot 3\text{H}_2\text{O}$ . The concentrated  
18 solution contained (g/L): 25.88 peptone, 4.24 yeast extract, 33.94  $\text{MgCl}_2 \cdot 6\text{H}_2\text{O}$ , 19.09  $\text{MgSO}_4 \cdot 7\text{H}_2\text{O}$ , 8.91  
19  $\text{CaCl}_2 \cdot 2\text{H}_2\text{O}$ , 8.91  $\text{NH}_4\text{Cl}$  and 0.11 allylthiourea (nitrification inhibitor). The trace-element solution contained  
20 (g/L): 1.50  $\text{FeCl}_3 \cdot 6\text{H}_2\text{O}$ , 0.03  $\text{CuSO}_4 \cdot 5\text{H}_2\text{O}$ , 0.12  $\text{MnCl}_2 \cdot 4\text{H}_2\text{O}$ , 0.06  $\text{Na}_2\text{MoO}_4 \cdot 2\text{H}_2\text{O}$ , 0.12  $\text{ZnSO}_4 \cdot 7\text{H}_2\text{O}$ , 0.15  
21  $\text{CoCl}_2 \cdot 6\text{H}_2\text{O}$ , 0.18 KI, 0.15  $\text{H}_3\text{BO}_3$  and 10 ethylenediamine tetraacetic acid. One liter of synthetic wastewater  
22 contained 1.94mL of P-water, 2.14 mL of concentrated solution, 0.27 mL of trace-element solution, and 0.267 mL  
23 of acetic acid. The synthetic wastewater final composition of the influent contained (mg/L): 55.38 peptone, 9.07  
24 yeast extract, 72.63  $\text{MgCl}_2 \cdot 6\text{H}_2\text{O}$ , 40.85  $\text{MgSO}_4 \cdot 7\text{H}_2\text{O}$ , 19.07  $\text{CaCl}_2 \cdot 2\text{H}_2\text{O}$ , 19.07  $\text{NH}_4\text{Cl}$ , 0.24 allylthiourea, 0.41  
25  $\text{FeCl}_3 \cdot 6\text{H}_2\text{O}$ , 0.01  $\text{CuSO}_4 \cdot 5\text{H}_2\text{O}$ , 0.03  $\text{MnCl}_2 \cdot 4\text{H}_2\text{O}$ , 0.02  $\text{Na}_2\text{MoO}_4 \cdot 2\text{H}_2\text{O}$ , 0.03  $\text{ZnSO}_4 \cdot 7\text{H}_2\text{O}$ , 0.04  $\text{CoCl}_2 \cdot 6\text{H}_2\text{O}$ ,  
26 0.05 KI, 0.04  $\text{H}_3\text{BO}_3$ , 2.70 ethylenediamine tetraacetic acid, 45.59  $\text{KH}_2\text{PO}_4$ , 34.14  $\text{K}_2\text{HPO}_4 \cdot 3\text{H}_2\text{O}$  and 280 acetic  
27 acid.

28 **Set-up and Operation of Parent Sequencing Batch Reactor (SBR).** The EBPR activated sludge was cultured  
29 with synthetic municipal wastewater in an anaerobic-aerobic SBR, which was covered by foil on the outside and  
30 had a working volume of 4 L with a cycle of 8 h consisting of 2 h anaerobic and 3h aerobic periods, followed by  
31 1h settling, 10 min decanting and 110 min idle periods. The reactor was maintained at  $21 \pm 1$  °C and constantly  
32 mixed with a magnetic stirrer except during the settling, decanting and idle periods. The influent pH was  
33 adjusted to 7.5 by adding 4 M NaOH or 4M HCl. In the aerobic stage, air was provided by an aerator using an  
34 on/off control system and the dissolved oxygen (DO) concentration maintained at around 6 mg/L. After the  
35 settling period, 3 L of the supernatant was discharged, and replaced with 3 L fresh synthetic wastewater during the  
36 next initial 10 min of the anaerobic time. Sludge was wasted at the end of aerobic periods to keep the solids

37 retention time (SRT) at approximately 10 d. The initial BOD concentration in the SBR was increased  
38 progressively over a 30 d period from around 80 to approximately 300 mg/L. The beginning ratio of BOD/SOP  
39 was 16, and it was increased to the final value of 20. After around 100 days' acclimatization, the phosphorus  
40 anaerobic release and aerobic uptake as well as net removal in the SBR reached relatively stable. The mixed  
41 liquid suspended solids (MLSS) and mixed liquid volatile suspended solids (MLVSS) were  $3200 \pm 190$  and  $2380$   
42  $\pm 126$  mg/L in the parent SBR.

43 **Stock Synthetic Wastewater Used in Batch Experiment.** In the batch experiment of short-term effect of  
44 CuNPs on phosphorus removal, 100 mL of synthetic wastewater was added to each reactor, and the final  
45 volume of the mixture in each reactor was 400 mL. Thus, the concentration of synthetic wastewater  
46 used in batch experiment would be 4 times higher than that used in the parent SBR, which meant  
47 that one liter of synthetic wastewater contains 1.07 mL acetic acid, 7.76 mL P-water, 8.56 mL  
48 concentrated solution, and 1.08 mL trace-element solution.

49 **Determination of CuNPs Removal Efficiency during EBPR.** At the beginning of the batch  
50 experiment of short-term effect of CuNPs on phosphorus removal, the CuNPs concentration in  
51 reactor A was 5 mg/L. At the end of aerobic stage, the sludge mixture was collected, and was acid  
52 digested using concentrated nitric acid at 125 °C for 2 h; Then the digested solution was filtered  
53 through 0.22 um mixed cellulose ester membrane, and determined by inductively coupled plasma  
54 optical emission spectrometry (ICP-OES, PerkinElmer Optima 2100 DV, USA). The aim of  
55 detecting the CuNPs concentration in the mixture was to confirm that the detected real  
56 concentration was matched with the theory one, and the detected concentration was set as  $C_0$ . In  
57 addition, at the end of settling period, the supernatant was withdrawn and the CuNPs concentration  
58 in the supernatant was detected following the same steps as the sludge mixture, and the  
59 concentration in the supernatant was set as  $C_1$ . Therefore, the removal efficiency was calculated

60 as:  $(1-C_1/C_0)*100\%$ .

61

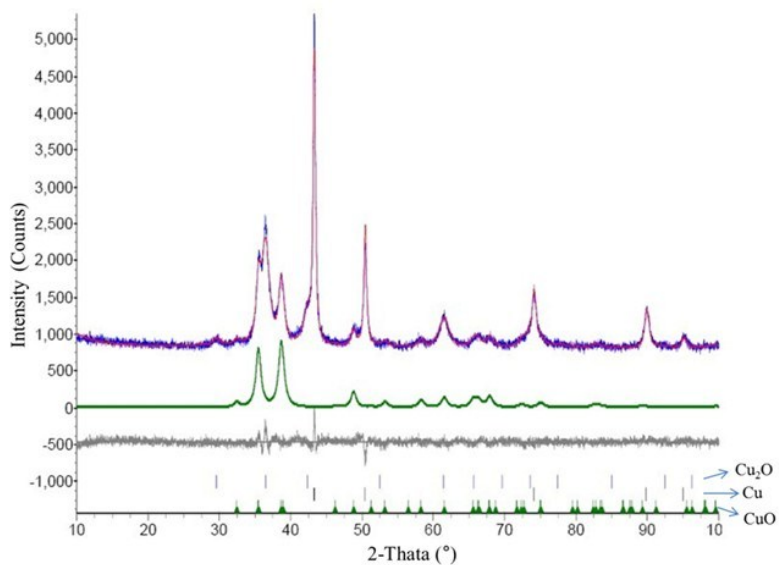

62

63

**Figure S1. The XRD pattern of the Cu-NPs used in this study.**

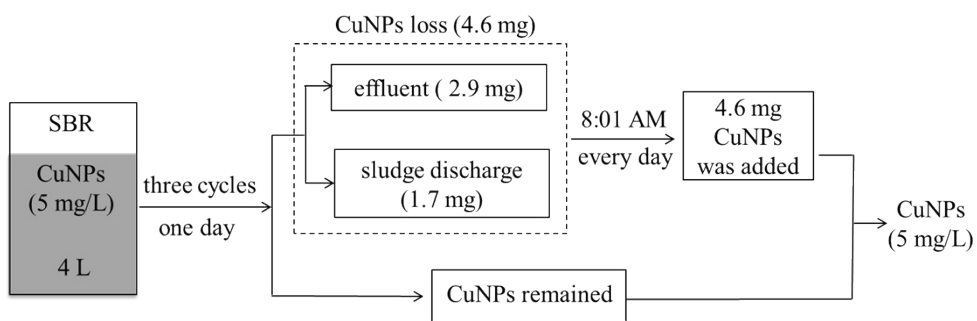

64

**Figure S2. Flow-process diagram of how to keep the CuNPs concentration in the reactor**

66

**constant.**

67

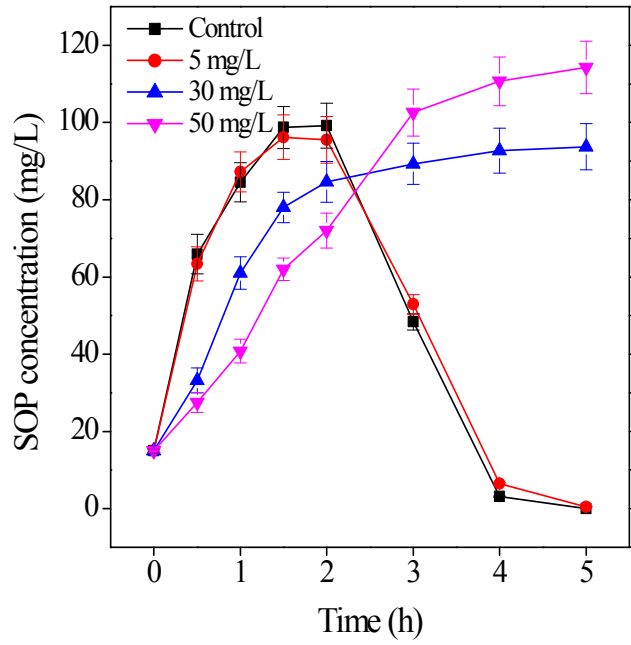

68  
 69 **Figure S3. Effect of shock load of CuNPs on biological phosphorus removal. Error bars represents**  
 70 **standard deviations of triplicate tests.**  
 71

72

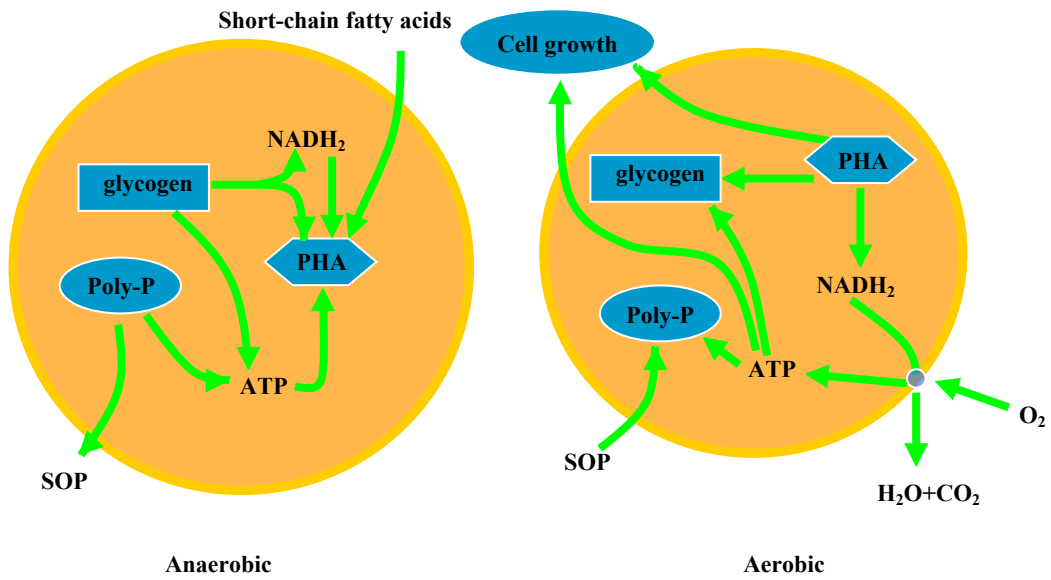

73  
 74 **Figure S4. The schematic diagram of main substrates metabolism involved in the anaerobic and aerobic**  
 75 **stages of enhanced biological phosphorus removal.**

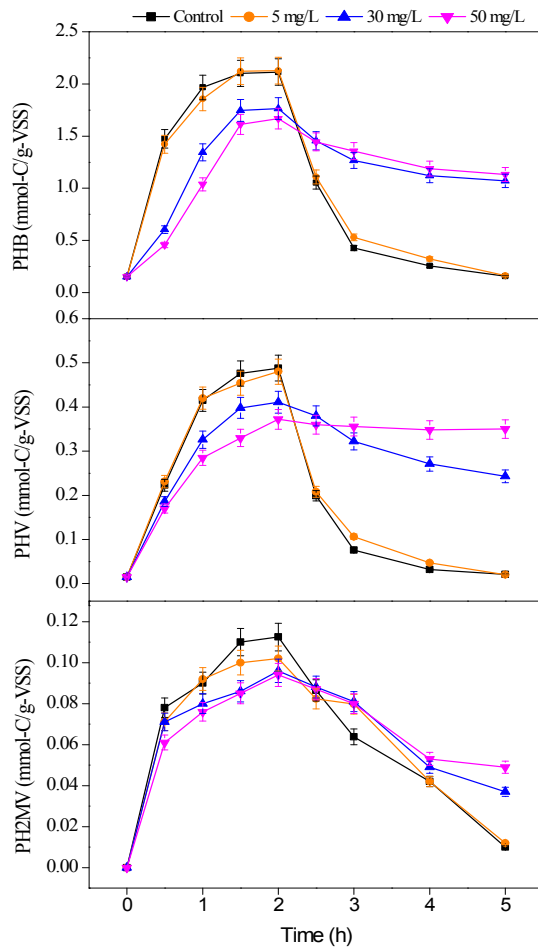

76

77 **Figure S5. Effect of shock load of CuNPs on transformations of PHB, PHV and PH2MV during one cycle of**  
 78 **EBPR. Error bars represents standard deviations of triplicate tests.**

79

80

81

**Table S1. Oligonucleotide Probes Used in This Study**

| Probe      | Specificity                                                         | Sequence (5'-3')         | FA (%) |
|------------|---------------------------------------------------------------------|--------------------------|--------|
| PAO462     | <i>Rhodocyclus</i> -related PAO in <i>Betaproteobacteria</i>        | CCGTCATCTACWCAGGGTATTAAC | 20-35  |
| PAO651     | <i>Rhodocyclus</i> -related PAO in <i>Betaproteobacteria</i>        | CCCTCTGCCAAACTCCAG       | 35     |
| PAO846     | <i>Rhodocyclus</i> -related PAO in <i>Betaproteobacteria</i>        | GTTAGCTACGGCACTAAAAGG    | 35     |
| GAO Q431   | <i>Gammaproteobacteria</i> <i>Competibacter</i> spp.                | TCCCCGCCTAAAGGGCTT       | 35     |
| GAO Q989   | <i>Gammaproteobacteria</i> <i>Competibacter</i> spp.                | TTCCCCGGATGTCAAGGC       | 35     |
| GB_G2      | <i>Gammaproteobacteria</i> <i>Competibacter</i> spp.                | TTCCCCAGATGTCAAGGC       | 35     |
| TFO_DF218  | <i>Defluvicoccus</i> -related TFO in <i>Alphaproteobacteria</i>     | GAAGCCTTTGCCCTCAG        | 20-35  |
| TFO_DF618  | <i>Defluvicoccus</i> -related TFO in <i>Alphaproteobacteria</i>     | GCCTCACTTGTCTAACCG       | 20-35  |
| DF988      | <i>Defluvicoccus</i> -related DF in <i>Alphaproteobacteria</i>      | GATACGACGCCCATGTCAAGGG   | 35     |
| DF1020     | <i>Defluvicoccus</i> -related DF in <i>Alphaproteobacteria</i>      | CCGGCCGAACCGACTCCC       | 35     |
| EUB338     | Most Bacteria                                                       | GCTGCCTCCCGTAGGAGT       | 35     |
| EUB338-II  | <i>Planctomycetales</i> and other Bacteria not detected by EUB338   | GCAGCCACCCGTAGGTGT       | 35     |
| EUB338-III | <i>Verrucomicrobiales</i> and other Bacteria not detected by EUB338 | GCTGCCACCCGTAGGTGT       | 35     |

82

**Table S2. Statistical Analysis Results of Effect of Shock Load of 5 mg/L CuNPs on Transformations of PHA and Glycogen during One EBPR Cycle (Compared with the Control)**

|          | $F_{\text{observed}}$ | $F_{\text{significance}}$ | $P_{(0.05)}$ |
|----------|-----------------------|---------------------------|--------------|
| PHA      | $7.5 \times 10^{-3}$  | 4.5                       | 0.98         |
| Glycogen | $6.2 \times 10^{-3}$  | 4.5                       | 0.94         |

83

**Table S3. Statistical Analysis Results of Effect of Shock Load of 5 mg/L CuNPs on Transformations of PHA and Glycogen during One EBPR Cycle (Compared with the Control)**

|     | $F_{\text{observed}}$ | $F_{\text{significance}}$ | $P_{(0.05)}$ |
|-----|-----------------------|---------------------------|--------------|
| PPX | 0.74                  | 7.71                      | 0.44         |
| PPK | 0.29                  | 7.1                       | 0.62         |

84

85

## 86 Reference

- 87 (1) Smolders, G. J. F.; Vandermeij, J.; Vanloosdrecht, M. C. M.; Heijnen, J. J. Model of the anaerobic metabolism  
 88 of the biological phosphorus removal process -stoichiometry and pH influence. *Biotechnol. Bioeng.* **1994**, *43*,  
 89 461-470.
